# Supplementary material
Source: PubMed Central journal article supplement (PMC3056075)
Supplement: NIHMS266972-supplement-01.pdf [file NIHMS266972-supplement-01.pdf]

**Supplementary Information**

**Integrin Organization: Linking Adhesion Ligand Nanopatterns with Altered Cell Responses**

W. A. Comisar, D. J. Mooney, J. J. Linderman

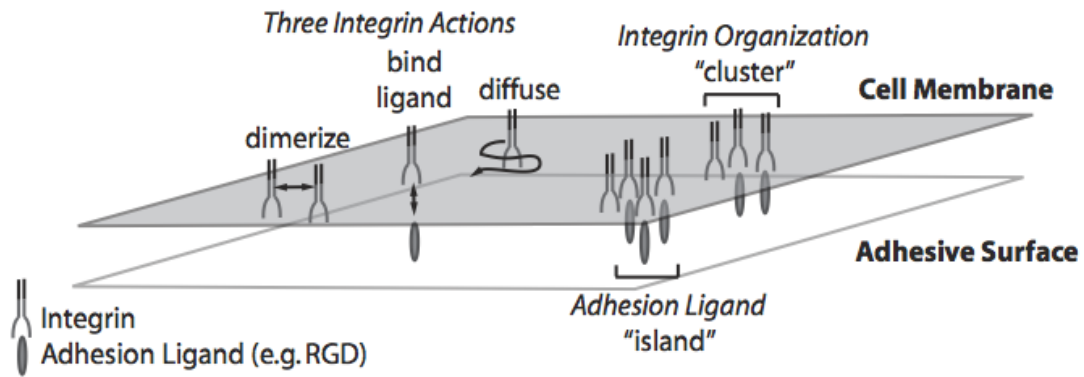

**Supplementary Figure 1. Cell adhesion to an adhesive surface.** Integrin receptors on the cell membrane can diffuse laterally, bind to and dissociate from adhesive ligand on the surface, and dimerize with and dissociate from other integrins. Ligand on the adhesive surface (such as RGD) may be presented singly or patterned into multivalent "islands." The ligand presentation (i.e. nanopatterning) in addition to the characteristic rate constants of the integrin actions determine the integrin organization on the cell membrane.

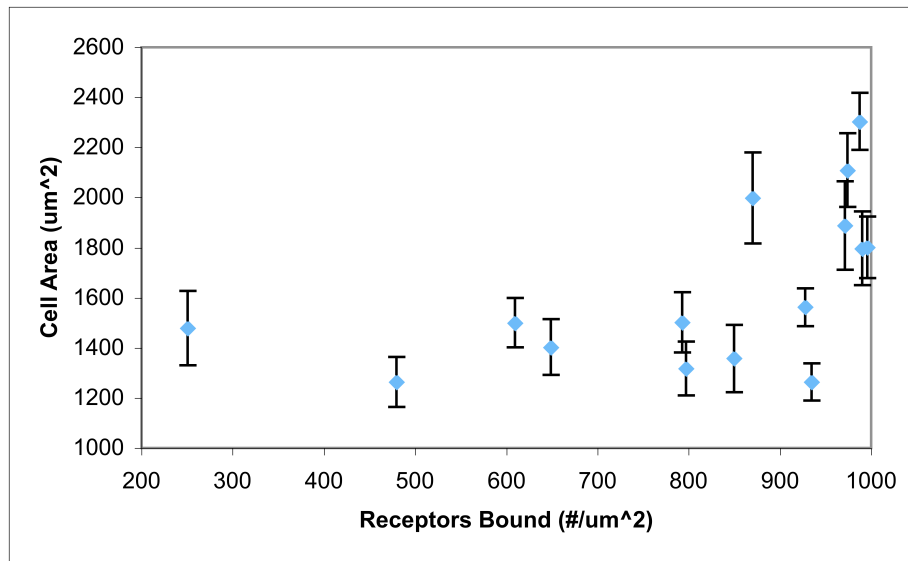

**Supplementary Figure 2. Cell area as a function of number of receptors bound.** Experimental measures of cell area (Comisar et al. 2007) are plotted as a function of predicted number of receptors bound. Data from 15 different nanopatterns (various values of F.C. and degree of substitution) are included. There is a strong correlation between cell area and receptors bound (see also Fig. 5).

**Effects of altered model input parameters on integrin organization and cell responses.** Altered model input parameters representing changes in the cell or adhesive surface were tested for their effect on measures of integrin organization (receptors bound, contact number, and BDNF (AUC)). Based on the correlative model described in the main text, we then predicted the effect on cell responses.

The results of these simulations are summarized in Supplementary Table 1. Complete numerical results and details can be found in (Comisar, 2007). The change to the experimental system represented by a change in particular model parameter is listed in column 1, while the corresponding change to model input is listed in column 2. Model inputs are indicated as increased or decreased based on comparison with the standard model input parameter values (see Methods). Similarly, the effect of changes to the model input parameters on receptors bound, contact number and BDNF (AUC) are compared to the values of these measures of integrin organization obtained using standard model input parameters (columns 3-5). Predictions of the effects of such changes in integrin organization on cell responses are listed in column 6.

Supplementary Table 1

| Change in Cell Type/Adhesive Surface             | Model Parameter                                                   | Receptors Bound                                                               | Contact Number                                                                              | BDNF (AUC)                                                                           | Predicted Effect                                                                                                                                                                                                                                      |
|--------------------------------------------------|-------------------------------------------------------------------|-------------------------------------------------------------------------------|---------------------------------------------------------------------------------------------|--------------------------------------------------------------------------------------|-------------------------------------------------------------------------------------------------------------------------------------------------------------------------------------------------------------------------------------------------------|
| Number of integrins able to bind adhesion ligand | ↑ Integrin Number (1778/ $\mu\text{m}^2$ )                        | Increased where not limited by ligand density                                 | Same trend in response to nanopatterns, though increased at all nanopatterns                | Greater difference between low and high F.C., same trend in response to nanopatterns | Higher cell spreading for lower values of F.C. and RGDs/island; increased sensitivity of cells to ligand nanopatterns; possible increase in MC3T3 osteogenic differentiation (ligand=RGD) where contact number and BDNF are both increased            |
|                                                  | ↓ Integrin Number (355/ $\mu\text{m}^2$ )                         | Significantly reduced; greatest reduction where not limited by ligand density | Not a function of nanopattern, decreased at all nanopatterns                                | Medium for all nanopatterns, not a function of nanopattern                           | Lower cell spreading; greatly decreased sensitivity of cells to ligand nanopatterns                                                                                                                                                                   |
| Integrins with altered ability to dimerize       | ↑ High Dimerization ( $k_{\text{dimer}}/k_{\text{mono}} = 10^5$ ) | Low to medium at all nanopatterns                                             | Less a function of nanopattern, high at all nanopatterns                                    | Low to medium for all nanopatterns, less a function of nanopattern                   | Lower level of cell spreading; slightly decreased sensitivity of cells to nanopatterns                                                                                                                                                                |
|                                                  | ↓ Low Dimerization ( $k_{\text{dimer}}/k_{\text{mono}} = 10^1$ )  | Same trend, small increase where not limited by ligand density                | Greater difference between low and high; same trend except decreased at high ligands/island | Same trend in response to RGD nanopatterns                                           | Some increase in cell spreading for intermediate levels of F.C. and ligands/island. Possible increase in sensitivity of cells to RGD nanopatterns and small decrease in osteogenic differentiation of MC3T3 cells at high ligands/island and low F.C. |
|                                                  | ↓↓ No Dimerization ( $k_{\text{dimer}}=0$ )                       | Same trend, small increase where not limited by ligand density                | Greater difference between low and high; same trend except decreased at high ligands/island | Same trend in response to nanopatterns                                               |                                                                                                                                                                                                                                                       |

|                           |                                                                                    |                                                                             |                                                                            |                                                            |                                                                                                                                                                        |
|---------------------------|------------------------------------------------------------------------------------|-----------------------------------------------------------------------------|----------------------------------------------------------------------------|------------------------------------------------------------|------------------------------------------------------------------------------------------------------------------------------------------------------------------------|
| Different adhesion ligand | ↑ Integrin-ligand affinity ( $k_{\text{bind}}/k_{\text{unbind}}$ base value x 100) | Small increase at all nanopatterns                                          | Smaller cluster size only for high ligands/island and F.C.>0.2, same trend | Same trend, overall lower                                  | Possible increase in pFAK Y397 for most nanopatterns                                                                                                                   |
|                           | ↓ Integrin-ligand affinity ( $k_{\text{bind}}/k_{\text{unbind}}$ base value/100)   | Significantly reduced at all nanopatterns —lowest levels of all simulations | Not a function of nanopattern, low at all nanopatterns                     | Not a function of nanopattern, low at all RGD nanopatterns | Lower cell spreading; greatly decreased sensitivity of cells to nanopatterns; possible increase in pFAK Y397 and decrease in osteogenic differentiation of MC3T3 cells |
